# Supplementary material
Source: MDPI journal article supplement (https://www.mdpi.com/1999-4907/8/5/156)
Supplement: s1 [file s1]

**Table S1.** Hemlock woolly adelgid (HWA) density differences of prune.

| **Pruning** | **Fertilizer** | **vs** | **Pruning** | **Fertilizer** | **Estimate** | **Standard Error** | **df** | ***t* Value** | ***p*** |
| --- | --- | --- | --- | --- | --- | --- | --- | --- | --- |
| +1 | + |  | + | 02 | -4.8 | 1.7 | 23 | -2.82 | 0.04 |
| + | + |  | 0 | + | -4.4 | 1.7 | 23 | -2.56 | 0.08 |
| + | + |  | 0 | 0 | -3.4 | 1.7 | 23 | -1.96 | 0.23 |
| + | 0 |  | 0 | + | 0.4 | 1.6 | 23 | 0.28 | 0.99 |
| + | 0 |  | 0 | 0 | 1.4 | 1.6 | 23 | 0.90 | 0.81 |
| 0 | + |  | 0 | 0 | 1.0 | 1.6 | 23 | 0.62 | 0.93 |

* fertilizer least squares means adjustment for multiple comparisons, Tukey-Kramer. The first two columns of pruning and fertilizer were compared to the third and fourth columns of pruning and fertilizer. If the *P* value was <0.05 and the Estimate > 0 then HWA density in the first and second columns of pruning and fertilizer were significantly greater than the pruning and fertilizer HWA density in the third and fourth columns. Conversely, if the *P* value was <0.05 and the Estimate < 0 then HWA density in the third and fourth columns of pruning and fertilizer were significantly greater than the pruning and fertilizer HWA density in the first and second columns. 1 Treatment was present. 2 Treatment was not present.

**Table S2.** Hemlock woolly adelgid (HWA) density differences of shade.

| **Shade** | **Fertilizer** | **vs** | **Shade** | **Fertilizer** | **Estimate** | **Standard Error** | **df** | ***t* Value** | ***p*** |
| --- | --- | --- | --- | --- | --- | --- | --- | --- | --- |
| +1 | + |  | + | 02 | 1.0 | 1.6 | 23 | 0.64 | 0.92 |
| + | + |  | 0 | + | 8.2 | 1.7 | 23 | 4.76 | <0.001 |
| + | + |  | 0 | 0 | 3.4 | 1.6 | 23 | 2.15 | 0.17 |
| + | 0 |  | 0 | + | 7.2 | 1.7 | 23 | 4.16 | 0.002 |
| + | 0 |  | 0 | 0 | 2.4 | 1.6 | 23 | 1.51 | 0.45 |
| 0 | + |  | 0 | 0 | -4.8 | 1.8 | 23 | -2.75 | 0.05 |

* fertilizer least squares means adjustment for multiple comparisons, Tukey-Kramer. The first two columns of shade * fertilizer were compared to the third and fourth columns of shade * fertilizer. If the *P* value was <0.05 and the Estimate > 0 then HWA density in the first and second columns of shade * fertilizer were significantly greater than the shade * fertilizer HWA density in the third and fourth columns. Conversely, if the *P* value was <0.05 and the Estimate < 0 then HWA density in the third and fourth columns of shade * fertilizer were significantly greater than the shade * fertilizer HWA density in the first and second columns.
1 Treatment was present. 2 Treatment was not present.

**Table S3.** Hemlock woolly adelgid (HWA) density differences of height.

| **Height** | **Cardinal direction** |  | **Height** | **Cardinal direction** | **Estimate** | **Standard Error** | **df** | ***t* Value** | ***p*** |
| --- | --- | --- | --- | --- | --- | --- | --- | --- | --- |
| high | east |  | high | north | -1.3 | 0.3 | 1390 | -3.37 | 0.04 |
| high | east |  | high | south | -0.9 | 0.3 | 1390 | -2.43 | 0.39 |
| high | east |  | high | west | 0.2 | 0.4 | 1390 | 0.46 | 1.0000 |
| high | east |  | low | east | -2.3 | 0.3 | 1390 | -6.82 | <0.0001 |
| high | east |  | low | north | -2.2 | 0.3 | 1390 | -6.23 | <0.0001 |
| high | east |  | low | south | -1.5 | 0.3 | 1390 | -3.97 | <0.01 |
| high | east |  | low | west | -0.2 | 0.4 | 1390 | -0.36 | 1.00 |
| high | east |  | mid | east | -2.8 | 0.3 | 1390 | -8.35 | <0.0001 |
| high | east |  | mid | north | -1.7 | 0.3 | 1390 | -4.84 | <0.0001 |
| high | east |  | mid | south | -1.6 | 0.3 | 1390 | -4.42 | <0.0001 |
| high | east |  | mid | west | -0.3 | 0.4 | 1390 | -0.64 | 1.00 |
| high | north |  | high | south | 0.3 | 0.3 | 1390 | 0.99 | 0.99 |
| high | north |  | high | west | 1.5 | 0.3 | 1390 | 3.78 | 0.01 |
| high | north |  | low | east | -1.1 | 0.2 | 1390 | -3.95 | <0.01 |
| high | north |  | low | north | -0.91 | 0.2 | 1390 | -3.25 | 0.05 |
| high | north |  | low | south | -0.2 | 0.3 | 1390 | -0.66 | 1.00 |
| high | north |  | low | west | 1.1 | 0.3 | 1390 | 3.04 | 0.10 |
| high | north |  | mid | east | -1.5 | 0.2 | 1390 | -5.82 | <0.0001 |
| high | north |  | mid | north | -0.5 | 0.2 | 1390 | -1.63 | 0.90 |
| high | north |  | mid | south | -0.3 | 0.2 | 1390 | -1.16 | 0.99 |
| high | north |  | mid | west | 0.9 | 0.3 | 1390 | 2.77 | 0.19 |
| high | south |  | high | west | 1.1 | 0.3 | 1390 | 2.86 | 0.16 |
| high | south |  | low | east | -1.4 | 0.2 | 1390 | -4.86 | <0.0001 |
| high | south |  | low | north | -1.2 | 0.2 | 1390 | -4.18 | <0.01 |
| high | south |  | low | south | -0.5 | 0.3 | 1390 | -1.64 | 0.8 |
| high | south |  | low | west | 0.8 | 0.3 | 1390 | 2.08 | 0.63 |
| high | south |  | mid | east | -1.0 | 0.2 | 1390 | -6.65 | <0.0001 |
| high | south |  | mid | north | -0.8 | 0.3 | 1390 | -2.60 | 0.27 |
| high | south |  | mid | south | -0.7 | 0.3 | 1390 | -2.14 | 0.59 |
| high | south |  | mid | west | 0.7 | 0.3 | 1390 | 1.81 | 0.81 |
| high | west |  | low | east | -2.5 | 0.3 | 1390 | -7.12 | <0.0001 |
| high | west |  | low | north | -2.3 | 0.3 | 1390 | -6.55 | <0.0001 |
| high | west |  | low | south | -1.6 | 0.3 | 1390 | -4.36 | <.001 |
| high | west |  | low | west | -0.3 | 0.4 | 1390 | -0.82 | 0.99 |
| high | west |  | mid | east | -2.9 | 0.3 | 1390 | -8.59 | <0.0001 |
| high | west |  | mid | north | -1.9 | 0.3 | 1390 | -5.21 | <0.0001 |
| high | west |  | mid | south | -1.7 | 0.3 | 1390 | -4.80 | <0.0001 |
| high | west |  | mid | west | -0.4 | 0.4 | 1390 | -1.09 | 0.99 |
| low | east |  | low | north | 0.1 | 0.2 | 1390 | 0.74 | 0.99 |
| low | east |  | low | south | 0.8 | 0.2 | 1390 | 3.33 | 0.04 |
| low | east |  | low | west | 2.1 | 0.3 | 1390 | 6.57 | <0.0001 |
| low | east |  | mid | east | -0.4 | 0.2 | 1390 | -2.03 | 0.67 |
| low | east |  | mid | north | 0.6 | 0.2 | 1390 | 2.38 | 0.42 |
| low | east |  | mid | south | 0.7 | 0.2 | 1390 | 2.85 | 0.1623 |
| low | east |  | mid | west | 2.1 | 0.3 | 1390 | 6.36 | <0.0001 |
| low | north |  | low | south | 0.7 | 0.2 | 1390 | 2.62 | 0.27 |
| low | north |  | low | west | 2.0 | 0.3 | 1390 | 5.96 | <0.0001 |
| low | north |  | mid | east | -0.6 | 0.2 | 1390 | -2.76 | 0.19 |
| low | north |  | mid | north | 0.4 | 0.2 | 1390 | 1.66 | 0.89 |
| low | north |  | mid | south | 0.5 | 0.2 | 1390 | 2.12 | 0.61 |
| low | north |  | mid | west | 1.9 | 0.3 | 1390 | 5.74 | <0.0001 |
| low | south |  | low | west | 1.3 | 0.3 | 1390 | 3.65 | 0.01 |
| low | south |  | mid | east | -1.3 | 0.2 | 1390 | -5.25 | <0.0001 |
| low | south |  | mid | north | -0.2 | 0.2 | 1390 | -0.98 | 0.99 |
| low | south |  | mid | south | -0.1 | 0.2 | 1390 | -0.51 | 1.00 |
| low | south |  | mid | west | 1.1 | 0.3 | 1390 | 3.39 | 0.03 |
| low | west |  | mid | east | -2.6 | 0.3 | 1390 | -8.14 | <0.0001 |
| low | west |  | mid | north | -1.5 | 0.3 | 1390 | -4.54 | <0.001 |
| low | west |  | mid | south | -1.4 | 0.3 | 1390 | -4.11 | 0.01 |
| low | west |  | mid | west | -0.1 | 0.4 | 1390 | -0.28 | 1.00 |
| mid | east |  | mid | north | 1.0 | 0.2 | 1390 | 4.35 | <0.001 |
| mid | east |  | mid | south | 1.2 | 0.2 | 1390 | 4.79 | <0.001 |
| mid | east |  | mid | west | 2.5 | 0.3 | 1390 | 7.97 | <0.0001 |
| mid | north |  | mid | south | 0.1 | 0.2 | 1390 | 0.47 | 1.00 |
| mid | north |  | mid | west | 1.4 | 0.3 | 1390 | 4.29 | <0.001 |
| mid | south |  | mid | west | 1.3 | 0.3 | 1390 | 3.86 | 0.01 |

* cardinal direction least squares means adjustment for multiple comparisons, Tukey-Kramer. The first two columns of height * cardinal direction were compared to the third and fourth columns of height * cardinal direction. If the *P* value was <0.05 and the Estimate > 0 then HWA density in the first and second columns of height * cardinal direction were significantly greater than the height * cardinal direction HWA density in the third and fourth columns. Conversely, if the *P* value was <0.05 and the Estimate < 0 then HWA density in the third and fourth columns of cardinal direction * side were significantly greater than the height * cardinal direction HWA density in the first and second columns.

**Table S4.** Tree health index differences of prune.

| **Prune** | **Fertilizer** | **vs** | **Prune** | **Fertilizer** | **Estimate** | **Standard Error** | **df** | ***t* Value** | ***p*** |
| --- | --- | --- | --- | --- | --- | --- | --- | --- | --- |
| +1 | + |  | + | 02 | -0.8 | 0.2 | 23 | -4.06 | 0.003 |
| + | + |  | 0 | + | -0.5 | 0.2 | 23 | -2.79 | 0.04 |
| + | + |  | 0 | 0 | -0.7 | 0.2 | 23 | -3.32 | 0.01 |
| + | 0 |  | 0 | + | 0.3 | 0.2 | 23 | 1.38 | 0.52 |
| + | 0 |  | 0 | 0 | 0.1 | 0.2 | 23 | 0.71 | 0.89 |
| 0 | + |  | 0 | 0 | -0.1 | 0.2 | 23 | -0.66 | 0.91 |

* fertilizer least squares means adjustment for multiple comparisons, Tukey-Kramer. The first two columns of prune * fertilizer were compared to the third and fourth columns of prune * fertilizer. If the *P* value was <0.05 and the Estimate > 0 then the tree health index in the first and second columns of prune * fertilizer were significantly greater than the prune * fertilizer tree health index in the third and fourth columns. Conversely, if the *P* value was <0.05 and the Estimate < 0 then the tree health index in the third and fourth columns of prune * fertilizer were significantly greater than the prune * fertilizer tree health index in the first and second columns. 1 Treatment was present. 2 Treatment was not present.

**Table S5.** Tree health index differences of shade.

| **Shade** | **Fertilizer** | **vs** | **Shade** | **Fertilizer** | **Estimate** | **Standard Error** | **df** | ***t* Value** | ***p*** |
| --- | --- | --- | --- | --- | --- | --- | --- | --- | --- |
| +1 | + |  | + | 02 | -0.9 | 0.2 | 23 | -4.86 | <0.001 |
| + | + |  | 0 | + | -1.9 | 0.2 | 23 | -9.48 | <0.0001 |
| + | + |  | 0 | 0 | -1.9 | 0.2 | 23 | -9.46 | <.0001 |
| + | 0 |  | 0 | + | -1.0 | 0.2 | 23 | -4.83 | <0.001 |
| + | 0 |  | 0 | 0 | -1.1 | 0.2 | 23 | -4.99 | <0.001 |
| 0 | + |  | 0 | 0 | -0.1 | 0.2 | 23 | -0.31 | 0.99 |

* fertilizer least squares means adjustment for multiple comparisons, Tukey-Kramer. The first two columns of shade * fertilizer were compared to the third and fourth columns of shade * fertilizer. If the *P* value was <0.05 and the Estimate > 0 then the tree health index in the first and second columns of shade * fertilizer were significantly greater than the shade * fertilizer tree health index in the third and fourth columns. Conversely, if the *P* value was <0.05 and the Estimate < 0 then the tree health index in the third and fourth columns of shade * fertilizer were significantly greater than the shade * fertilizer tree health index in the first and second columns. 1 Treatment was present. 2 Treatment was not present.
